# Supplementary material for: A Proposed Methodology to Deal with the Impact of In Vitro Cellular Matrix on the Analytical Performances of a Targeted Metabolomic LC-HRMS Method
Source: MDPI journal article supplement (doi:10.3390/ijms24043770), 2023-02-13
Supplement: s1 [file s1]

Table S1. List of the 88 metabolites included in the LC-MS/HRMS method and their related internal standard. Positive and negative ionization modes corresponded to  $[M+H]^+$  and  $[M-H]^-$  ions, respectively were used for the quantification.

| Metabolite                | Retention time (min) | Ionization mode | m/z       | Internal standard           |
|---------------------------|----------------------|-----------------|-----------|-----------------------------|
| Acetylcarnitine           | 5,1                  | Positive        | 204.12303 | Acetylcarnitine (D3)        |
| Acetylcholine             | 3,5                  | Positive        | 146.11756 | Proline (13C5, 15N)         |
| Aconitic acid             | 10,0                 | Positive        | 175.02371 | Citric acid (D4)            |
| Adenine                   | 6,6                  | Positive        | 136.06177 | Methionine (13C5, 15N)      |
| Adenosine                 | 11,1                 | Positive        | 268.10403 | ThioNAD                     |
| Alanine                   | 2,7                  | Positive        | 90.05500  | Alanine (13C3, 15N)         |
| Alpha-ketoglutarate       | 5,6                  | Negative        | 145.01425 | Succinic acid (D4)          |
| AMP                       | 9,0                  | Positive        | 348.07036 | ThioNAD                     |
| Arginine                  | 2,8                  | Positive        | 175.11900 | Arginine (13C6, 15N4 )      |
| Asparagine                | 2,7                  | Positive        | 133.06080 | Serine (13C3, 15N)          |
| Aspartic acid             | 2,7                  | Positive        | 134.04478 | Aspartic acid (13C4, 15N)   |
| Biotine                   | 17,6                 | Negative        | 243.08089 | Phenylalanine (13C9, 15N)   |
| Carnitine                 | 3,1                  | Positive        | 162.11247 | MethylCarnitine (D3)        |
| Choline                   | 3,3                  | Positive        | 104.10699 | Choline (D9)                |
| Choline phosphate         | 2,9                  | Positive        | 184.07332 | Choline (D9)                |
| Citric acid               | 8,4                  | Negative        | 191.01973 | Citric acid (D4)            |
| Citrulline                | 3,0                  | Positive        | 176.10297 | Citrulline (D4)             |
| CMP                       | 4,8                  | Positive        | 324.05913 | ThioNAD                     |
| Coumaric acid             | 19,4                 | Positive        | 165.05462 | Citric acid (D4)            |
| Creatine                  | 3,4                  | Positive        | 132.07675 | Proline (13C5, 15N)         |
| Creatinine                | 3,1                  | Positive        | 114.06619 | Proline (13C5, 15N)         |
| Cysteine                  | 3,0                  | Positive        | 122.02700 | Citrulline (D4)             |
| Fructose-1,6-bisphosphate | 2,8                  | Negative        | 338.98877 | Fructose-6-Phosphate (13C6) |
| Fumaric acid              | 9,8                  | Negative        | 115.00370 | Succinic acid (D4)          |
| GABA                      | 2,9                  | Negative        | 102.05605 | Glutamic acid (13C5, 15N)   |
| GDP mannose               | 9,8                  | Negative        | 604.06990 | Fructose-6-Phosphate (13C6) |
| Glutamic acid             | 2,9                  | Positive        | 148.06040 | Glutamic acid (13C5, 15N)   |
| Glutamine                 | 2,8                  | Positive        | 147.07640 | Aspartic acid (13C4, 15N)   |
| Glycero-3-phosphocholine  | 2,9                  | Positive        | 258.11010 | Choline (D9)                |
| Glycine                   | 2,7                  | Positive        | 76.03930  | Glycine (13C2, 15N)         |
| GMP                       | 9,8                  | Positive        | 364.06528 | ThioNAD                     |
| Hexanoylcarnitine         | 7,1                  | Positive        | 260.18563 | Acetylcarnitine (D3)        |
| Hexose phosphate          | 2,8                  | Negative        | 259.02244 | Fructose-6-Phosphate (13C6) |
| Histidine                 | 2,7                  | Positive        | 156.07675 | Histidine (13C6, 15N3 )     |
| Hydroxyindolacetic acid   | 11,9                 | Positive        | 192.06552 | Phenylalanine (13C9, 15N)   |
| Hydroxyproline            | 8,7                  | Positive        | 132.06552 | Threonine (13C4, 15N)       |
| Hypoxanthine              | 8,2                  | Positive        | 137.04579 | ThioNAD                     |
| Inosine                   | 11,6                 | Negative        | 267.07349 | ThioNAD                     |
| Isocitric acid            | 4,7                  | Negative        | 191.01973 | Citric acid (D4)            |

|                               |      |          |           |                             |
|-------------------------------|------|----------|-----------|-----------------------------|
| Isoleucine                    | 9,7  | Positive | 132.10190 | Isoleucine (13C6, 15N)      |
| Lactic acid                   | 5,6  | Negative | 89.02442  | Succinic acid (D4)          |
| Leucine                       | 10,1 | Positive | 132.10190 | Leucine (13C6)              |
| Lysine                        | 2,3  | Positive | 147.11280 | Lysine (13C6, 15N2 )        |
| Malic acid                    | 4,5  | Negative | 133.01425 | Succinic acid (D4)          |
| Methionine                    | 5,6  | Positive | 150.05830 | Methionine (13C5, 15N)      |
| Methylhippuric acid           | 18,0 | Negative | 192.06662 | Phenylalanine (13C9, 15N)   |
| N-acetylglucosamine phosphate | 3,0  | Negative | 227.03261 | Fructose-6-Phosphate (13C6) |
| N-acetylneuraminic acid       | 3,4  | Negative | 308.09870 | Citrulline (D4)             |
| N-acetylorithine              | 3,9  | Positive | 175.10772 | Ornithine (13C5)            |
| N-acetylputrescine            | 3,8  | Positive | 131.11789 | Spermine (D8)               |
| N-acetylserine                | 2,9  | Positive | 148.06043 | Serine (13C3, 15N)          |
| N-acetylspermidine            | 2,8  | Positive | 188.17570 | Fructose-6-Phosphate (13C6) |
| N-acetylspermine              | 2,5  | Positive | 245.23359 | Spermine (D8)               |
| NAD                           | 10,0 | Positive | 664.11639 | ThioNAD                     |
| NAM                           | 9,7  | Positive | 123.05528 | NAM (13C6)                  |
| Nicotinamide-N-oxide          | 7,0  | Positive | 139.05020 | NAM (13C6)                  |
| N-methylnicotinamide          | 3,1  | Positive | 137.07094 | NAM (13C6)                  |
| NMN                           | 4,8  | Positive | 335.06388 | NAM (13C6)                  |
| Norleucine                    | 9,3  | Positive | 132.10190 | Leucine (13C6)              |
| O-propanoylcarnitine          | 10,1 | Positive | 218.13868 | Tyrosine (13C9, 15N)        |
| Oxidized glutathione          | 10,2 | Positive | 613.15920 | Tyrosine (13C9, 15N)        |
| Ornithine                     | 2,4  | Positive | 133.09715 | Ornithine (13C5)            |
| Oxaloacetate                  | 8,7  | Negative | 130.99860 | Citric acid (D4)            |
| Oxoglutaric acid              | 8,5  | Positive | 147.02880 | Citric acid (D4)            |
| Pantothenic acid              | 13,6 | Positive | 220.11795 | Phenylalanine (13C9, 15N)   |
| Phenylalanine                 | 12,5 | Positive | 166.08626 | Phenylalanine (13C9, 15N)   |
| 3-phosphoglyceric acid        | 3,2  | Negative | 184.98566 | Proline (13C5, 15N)         |
| Proline                       | 3,3  | Positive | 116.07060 | Proline (13C5, 15N)         |
| Putrescine                    | 2,3  | Positive | 89.10732  | Lysine (13C6, 15N2 )        |
| Pyroglutamic acid             | 8,8  | Positive | 130.04987 | Glutamic acid (13C5, 15N)   |
| Pyruvate                      | 4,4  | Negative | 87.00877  | Citric acid (D4)            |
| Reduced glutathione           | 6,7  | Negative | 306.07650 | Methionine (13C5, 15N)      |
| Ribose phosphate              | 3,0  | Negative | 229.01190 | Fructose-6-Phosphate (13C6) |
| SAH                           | 10,4 | Positive | 385.12890 | ThioNAD                     |
| SAM                           | 2,9  | Positive | 399.14450 | Citrulline (D4)             |
| Serine                        | 2,7  | Positive | 106.04990 | Serine (13C3, 15N)          |
| Spermidine                    | 2,1  | Positive | 146.16517 | Spermine (D8)               |
| Spermine                      | 2,0  | Positive | 203.22300 | Spermine (D8)               |
| Succinic acid                 | 9,7  | Negative | 117.01930 | Succinic acid (D4)          |
| Thiamine                      | 3,5  | Positive | 265.11176 | Citrulline (D4)             |
| Threonine                     | 2,9  | Positive | 120.06552 | Threonine (13C4, 15N)       |
| Tryptophane                   | 14,7 | Positive | 205.09715 | Phenylalanine (13C9, 15N)   |
| Tyrosine                      | 10,1 | Positive | 182.08117 | Tyrosine (13C9, 15N)        |

|                        |      |          |           |                      |
|------------------------|------|----------|-----------|----------------------|
| UDP N-Acetylhexosamine | 5,0  | Positive | 608.08885 | Valine (13C5, 15N)   |
| UDP hexose             | 8,5  | Negative | 565.04770 | Valine (13C5, 15N)   |
| UMP                    | 6,3  | Positive | 325.04314 | ThioNAD              |
| Valine                 | 4,4  | Positive | 118.08626 | Valine (13C5, 15N)   |
| Xanthine               | 10,5 | Positive | 153.04070 | Tyrosine (13C9, 15N) |
